# Supplementary material for: Elevating CDCA3 levels in non-small cell lung cancer enhances sensitivity to platinum-based chemotherapy
Source: PubMed Central journal article supplement (PMC8163776; doi:10.1038/s42003-021-02136-8), 2021-05-28
Supplement: 42003_2021_2136_MOESM2_ESM.pdf [file 42003_2021_2136_MOESM2_ESM.pdf]

## Description of Additional Supplementary Files

**File name:** Supplemental Data 1

**Description:** Source data underlying figures is presented in Supplemental Data 1.
